# Supplementary material
Source: publisher figshare collection journal article supplement (https://gsajournals.figshare.com/ndownloader/files/26557604)
Supplement: Supplementary file 1 [file 26557604]

## Sheet: Sheet1
Table S1. Raw statistics of Hermetia illucens de novo DNA sequencing.
Input individual	Sex	Platform	Reads produced	Estimated depth (X)
Reference pupa	NA	PacBio Sequel	6 million	141
Reference pupa	NA	10X	391 million	84
Related adult	Female	Illumina	444 million	61
Related adult	Male	Illumina	479 million	65
Reference sibling pupa	NA	Hi-C	478 million	126
Source and produced data for the sequencing and assembly of the H. illucens genome. Estimated depth calculated based on iHerIll final genome size.
